# Supplementary material
Source: PubMed Central journal article supplement (PMC3863797)
Supplement: mt2013191x1.pdf [file mt2013191x1.pdf]

Supplementary Figure 1

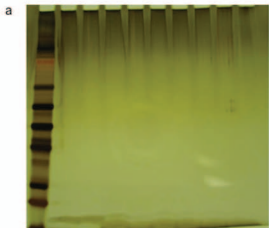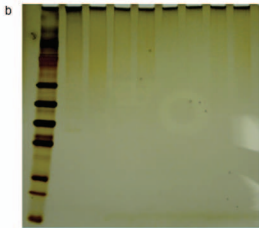

Supplementary figure 2

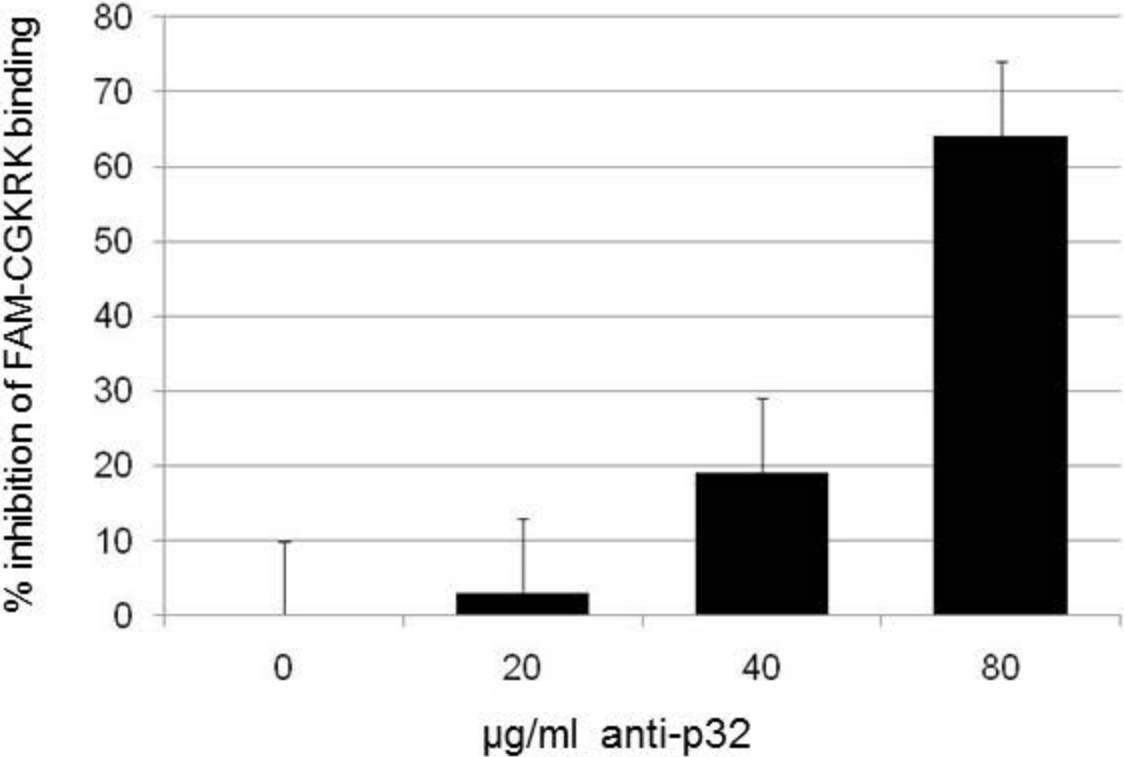

Supplementary figure 3

Heart

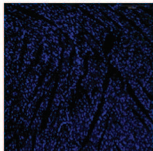

Brain

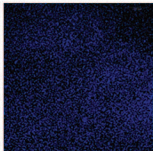

Liver

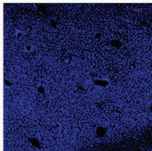

Pancreas

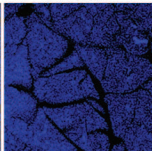

Lung

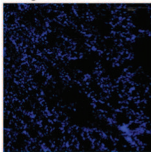

Kidney

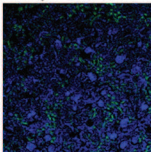

Spleen

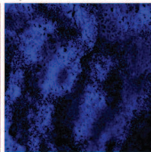

CGKRRK-peptide  
DAPI

Supplementary figure 4

Brain

Heart

Lung

Pancreas

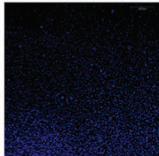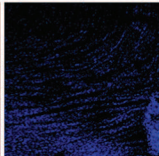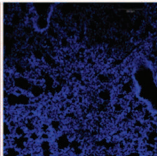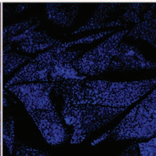

Spleen

Liver

Kidney

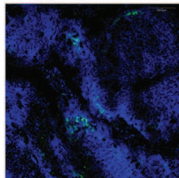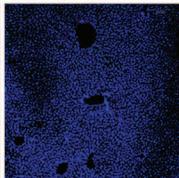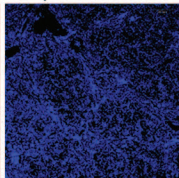

CGKRK-NW  
DAPI

# Supplementary Figure 5

CGKRK-NWs

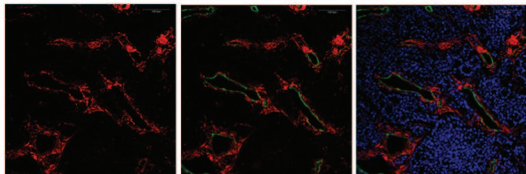

$\alpha$ [KLAKLAK]<sub>2</sub>-NWs

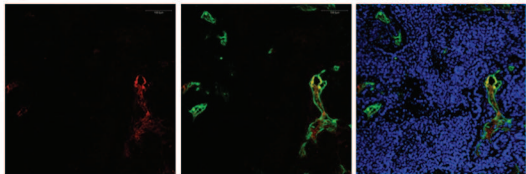

CD31  
Dapi

Supplementary figure 6

Brain

Heart

Lung

Pancreas

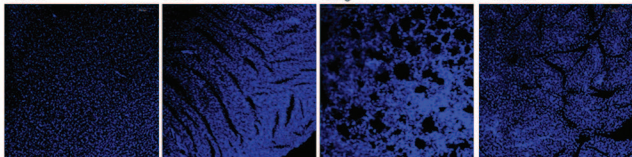

Spleen

Liver

Kidney

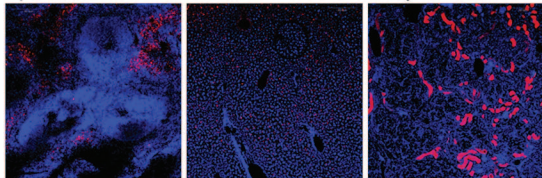

CGKRK-KLAKLAK-NWs  
DAPI

Supplementary Fig.7

a 24 hr

48 hr

3 weeks

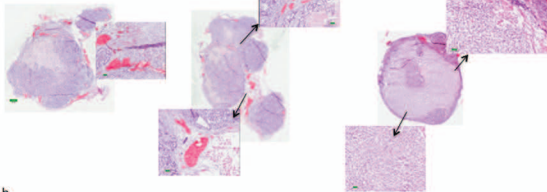

b

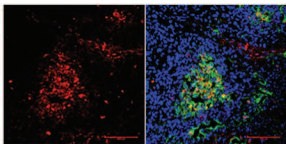

c

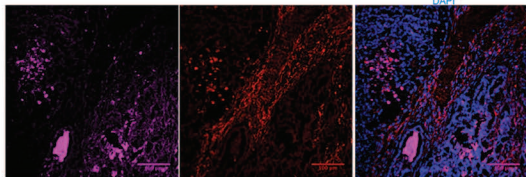

d

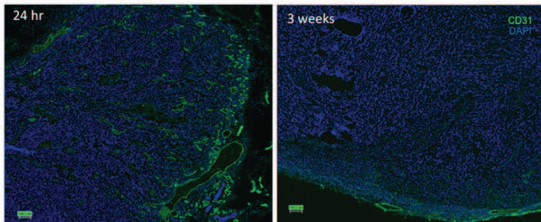

Supplementary Table 1

| Protein identification            | Symbol   | Fragments of interest | Total fragments | %  |
|-----------------------------------|----------|-----------------------|-----------------|----|
| Actin                             | ACT1     | 24                    | 88              | 27 |
| Actin                             | ACT1     | 17                    | 88              | 19 |
| Cytoskeleton-associated protein 4 | Ckap4    | 5                     | 74              | 7  |
| Nucleo-ribonucleoprotein A2/B1    | Nrpa2/B1 | 20                    | 88              | 23 |
| act1                              | act1     | 24                    | 88              | 27 |
